# Supplementary material for: Tepotinib in patients with non-small cell lung cancer with high-level MET amplification detected by liquid biopsy: VISION Cohort B
Source: PubMed Central journal article supplement (PMC10694660; doi:10.1016/j.xcrm.2023.101280), 2023-11-08
Supplement: mmc1.pdf [file mmc1.pdf]

**Cell Reports Medicine, Volume 4**

**Supplemental information**

**Tepotinib in patients with non-small cell lung  
cancer with high-level *MET* amplification  
detected by liquid biopsy: VISION Cohort B**

**Xiuning Le, Luis G. Paz-Ares, Jan Van Meerbeeck, Santiago Viteri, Carlos Cabrera Galvez, Egbert F. Smit, Marina Garassino, Remi Veillon, David Vicente Baz, Jose Fuentes Pradera, María Sereno, Toshiyuki Kozuki, Young-Chul Kim, Seung Soo Yoo, Ji-Youn Han, Jin-Hyoung Kang, Choon-Hee Son, Yoon Ji Choi, Christopher Stroh, Dilafuz Juraeva, Helene Vioix, Rolf Bruns, Gordon Otto, Andreas Johnne, and Paul K. Paik**

## Supplementary materials

### Supplementary Figures

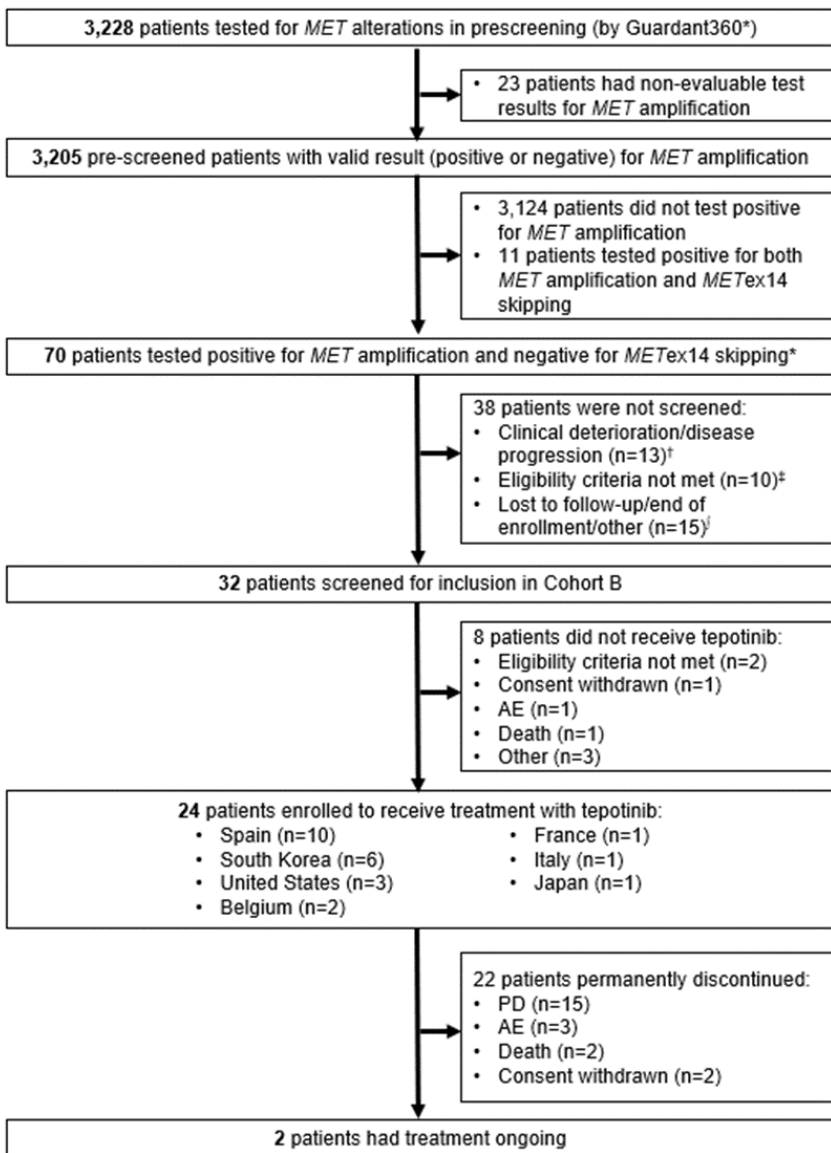

**Supplementary Fig 1.** Screening and enrollment. Related to Table 1. \*Includes all patients prescreened by the Guardant360<sup>®</sup> liquid biopsy assay for enrollment into any cohort of VISION, including those assessed after closure of Cohort B. †Includes death (n=8), poor PS (n=2), hospice (n=1), general worsening (n=1), progressive disease (n=1). ‡Includes *EGFR/ALK* positive (n=6), received more than 2 prior lines of therapy (n=2), symptomatic brain metastases (n=1), unspecified (n=1). §Includes lost to follow-up (n=4), end of study enrollment (n=4), enrolled in another study (n=1), patient refusal to screen (n=1), investigator refusal to enroll in study (n=1), other (n=4). AE, adverse event; *METex14*, *MET* exon 14; PD, progressive disease; PS, performance status.

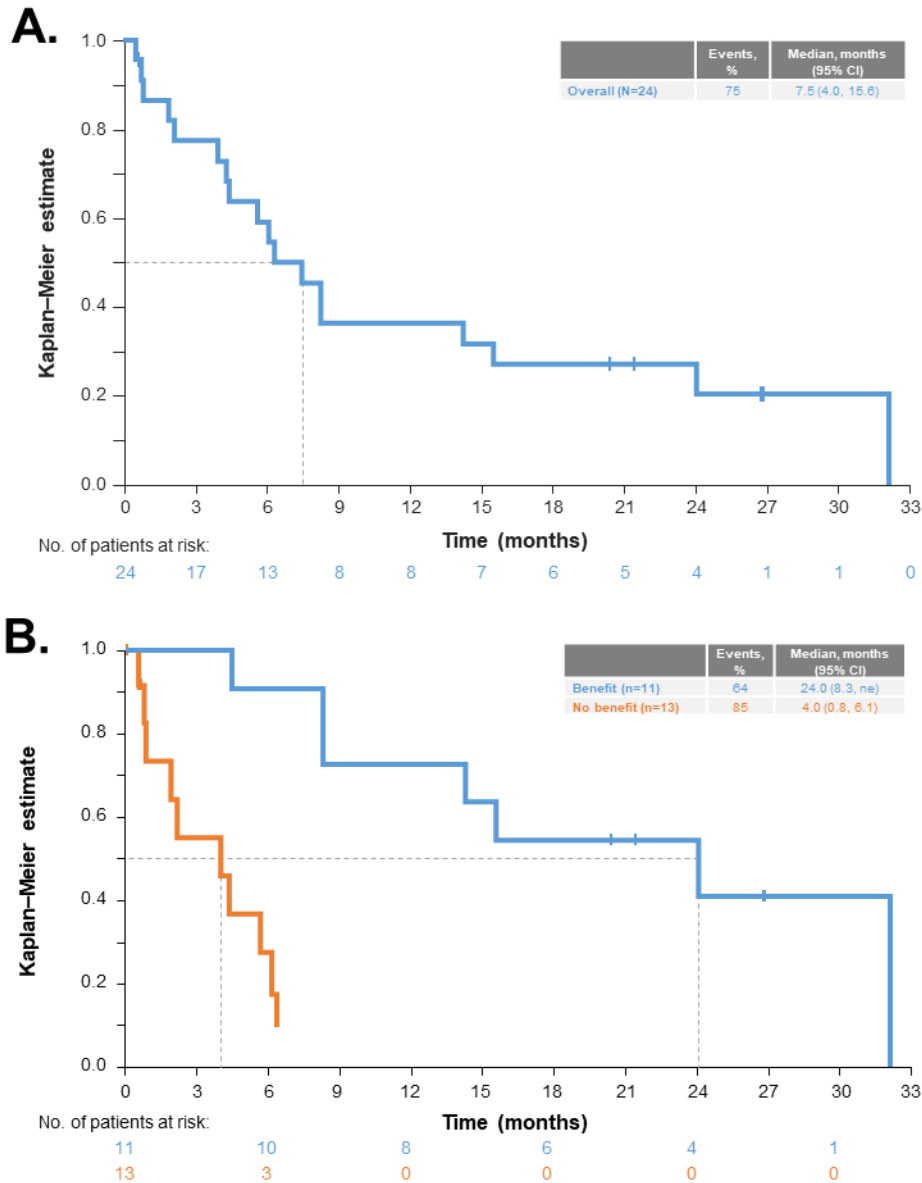

**Supplementary Fig 2.** Kaplan–Meier plots showing OS in the overall population (A), or according to clinical benefit (B). Related to Figure 1. CI, confidence interval; ne, not estimable; OS, overall survival.

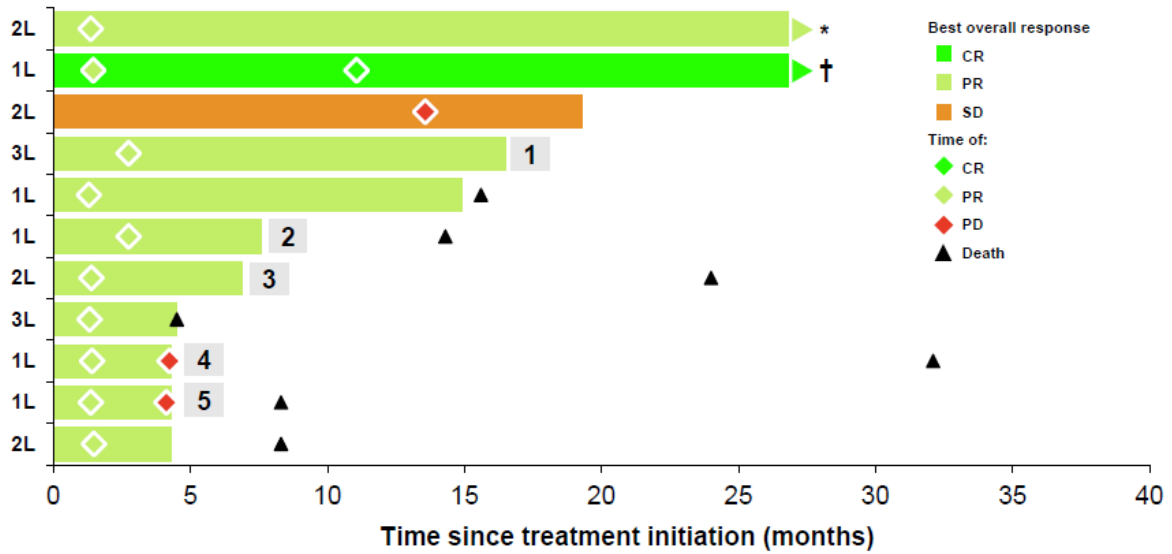

**Post-study therapy:**

- 1 Docetaxel
- 2 Pemetrexed+cisplatin
- 3 Paclitaxel+carboplatin+bevacizumab+atezolizumab → docetaxel+ramucirumab → tegafur
- 4 Pembrolizumab → pemetrexed → nivolumab → docetaxel
- 5 Pemetrexed+carboplatin

**Supplementary Fig 3.** Swimmer plot showing time on treatment and response by IRC for patients who achieved clinical benefit (n=11). Related to Table 2. Vertical axis labels indicate line of tepotinib therapy. Color arrow heads in the figure indicate treatment is ongoing. \*On tepotinib treatment for >41 months. †Patient discontinued treatment shortly after data cut and the patient remains in CR >14 months later without additional treatment. 1L, first line; 2L, second line; 3L, third line; CR, complete response; IRC, independent review committee; PD, progressive disease; PR, partial response; SD, stable disease.

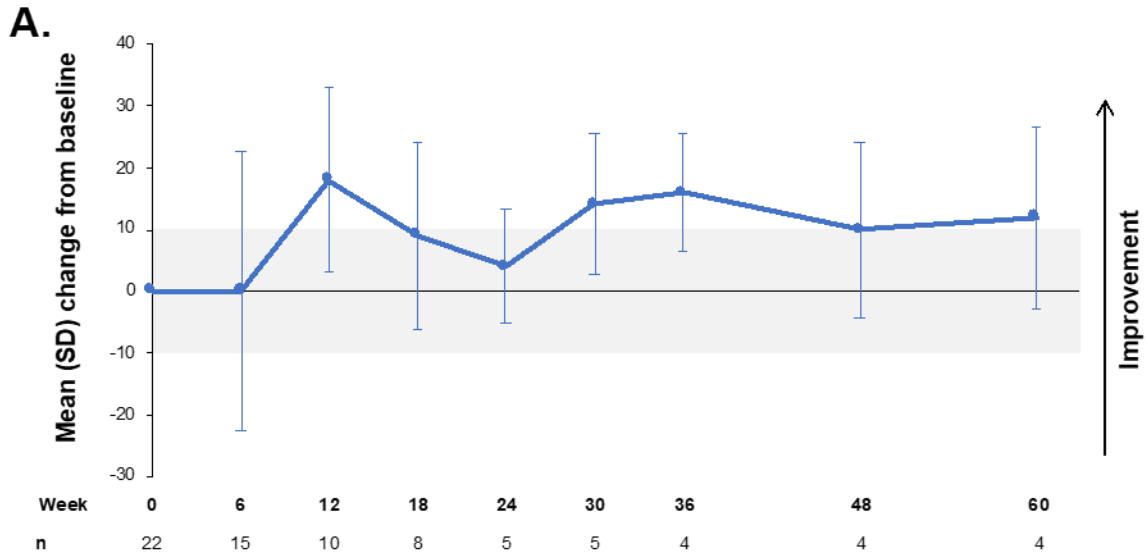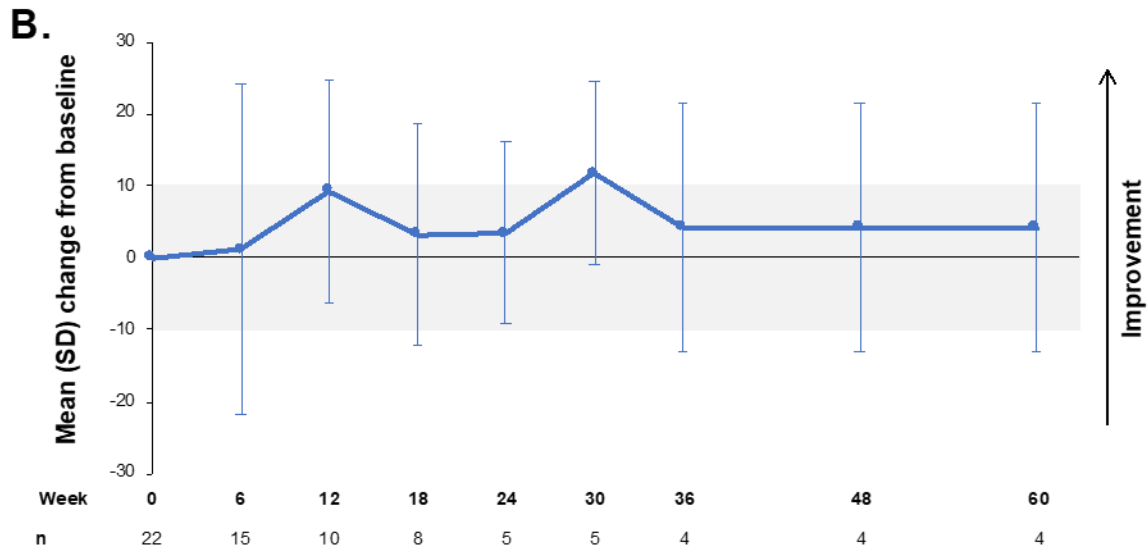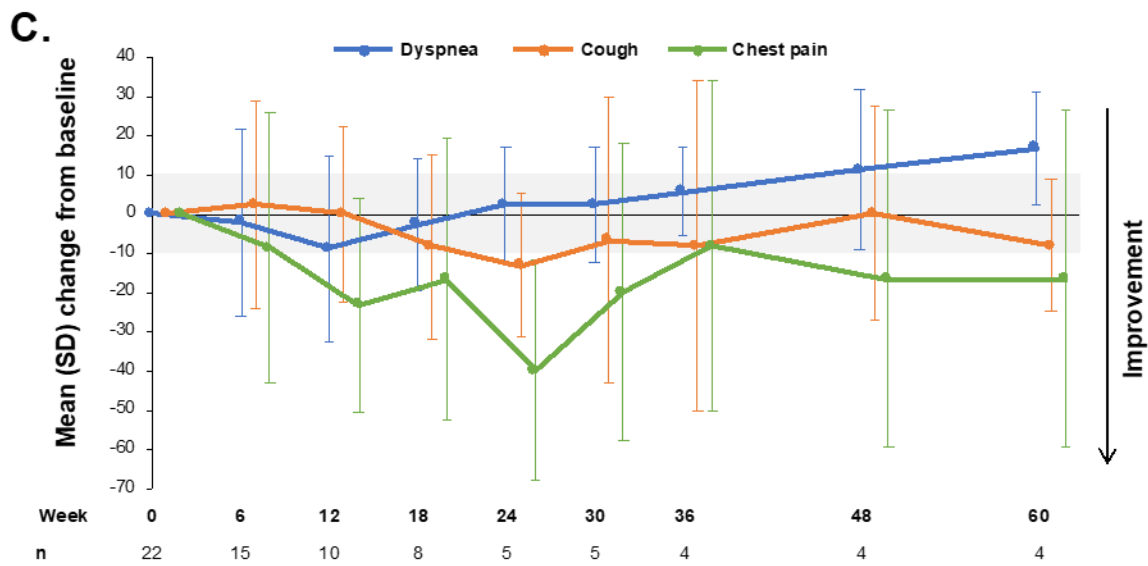

**Supplementary Fig 4.** Mean change from baseline by visit in EQ-5D-5L VAS (A), EORTC QLQ-C30 GHS (B) and EORTC QLQ-LC13 symptom scores (C). Related to Table 2. Shaded areas represent the threshold for minimal clinically important difference (i.e.  $\pm 10$  points). EORTC QLQ-C30, European Organisation for Research and Treatment of Cancer Quality of Life Questionnaire Core 30; EORTC QLQ-LC13, European Organisation for Research and Treatment of Cancer Quality of Life Questionnaire Lung Cancer 13; EQ-5D-5L, EuroQol 5-dimension 5-level; GHS, global health score; SD, standard deviation; VAS, visual analog scale.

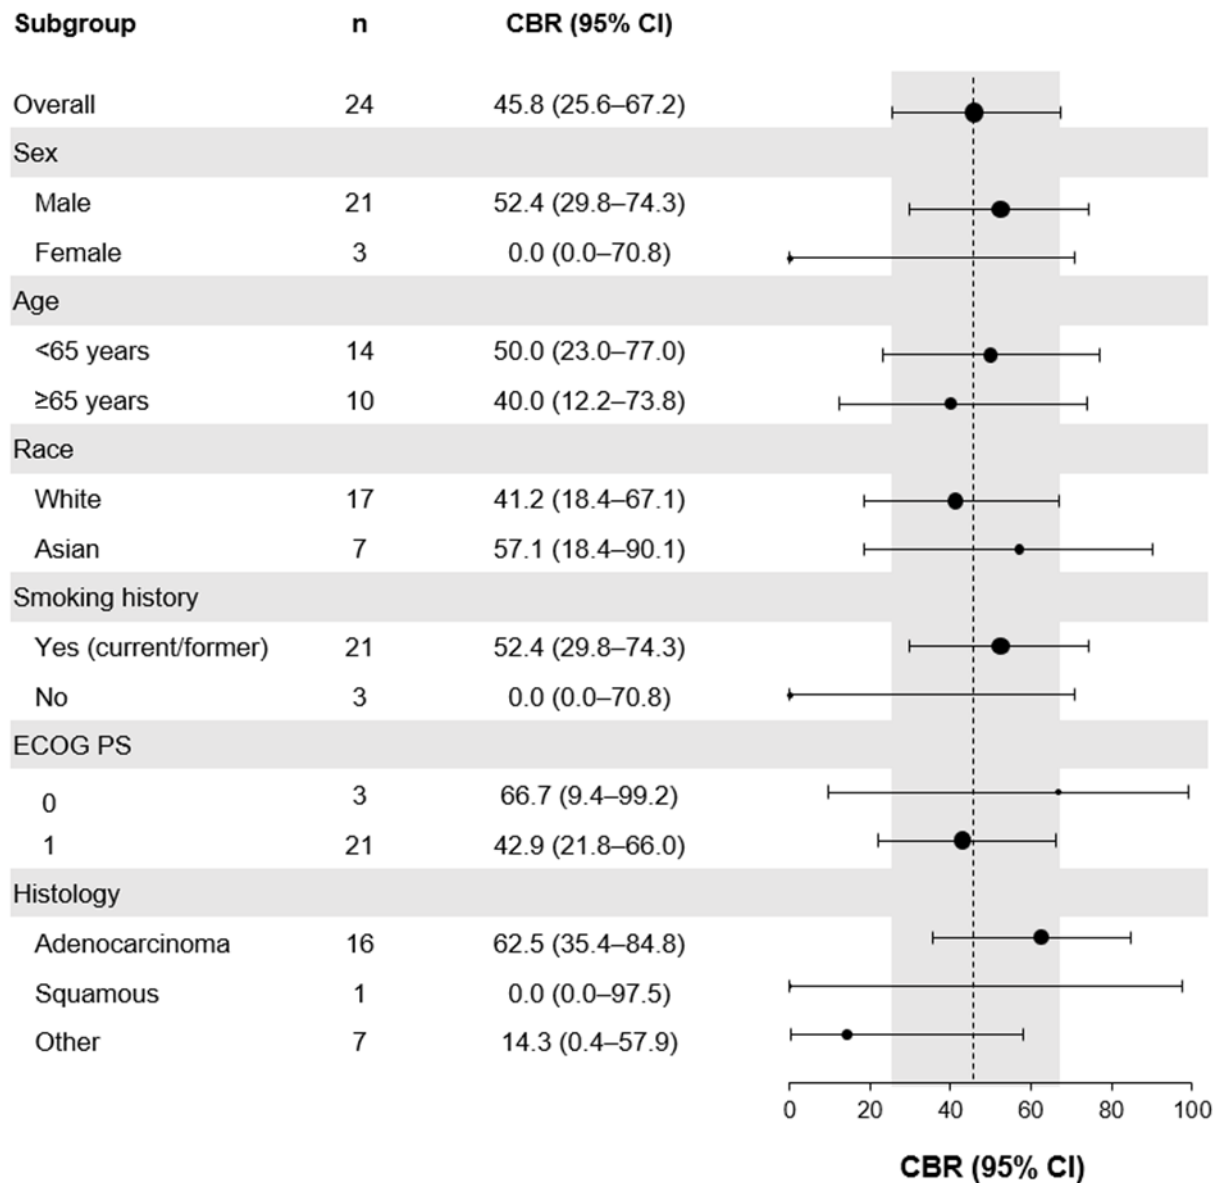

**Supplementary Fig 5.** Clinical benefit per IRC by patient characteristics. Related to Table 2. CBR, clinical benefit rate (complete response + partial response + stable disease); CI, confidence interval; ECOG PS, Eastern Cooperative Oncology Group performance status; IRC, independent review committee.

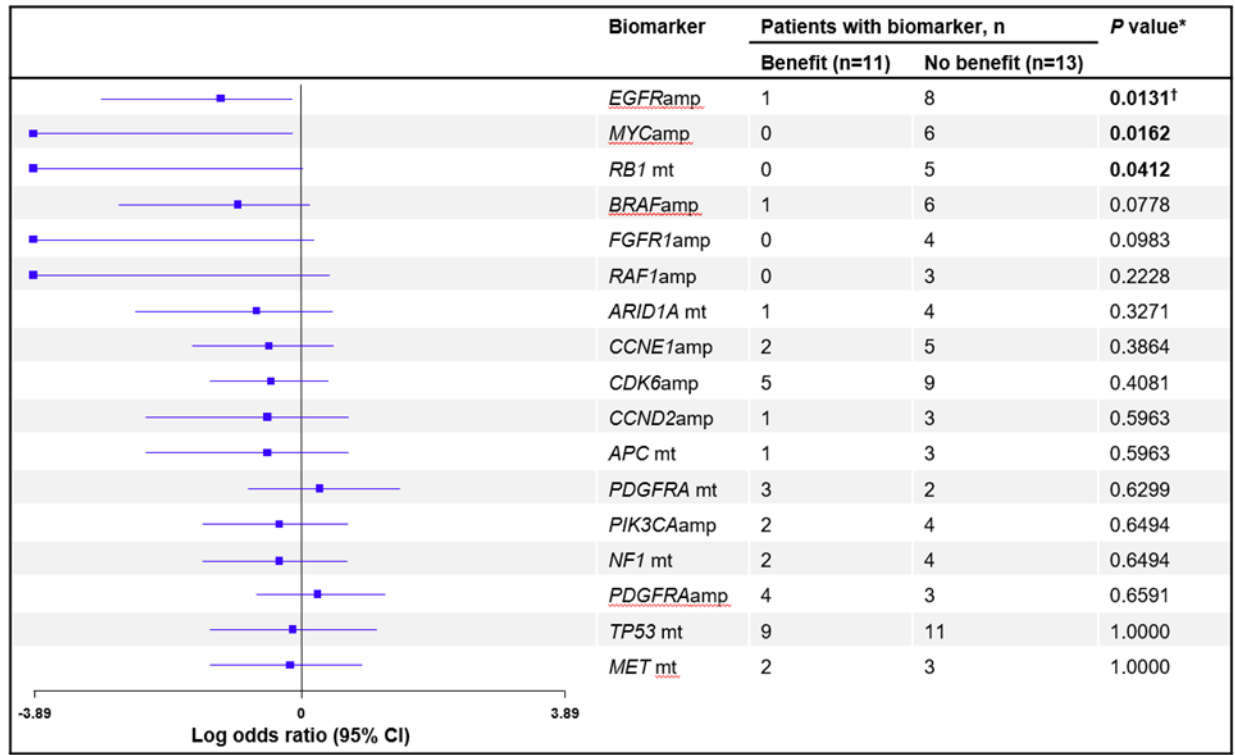

**Supplementary Fig 6.** Exploratory analysis comparing the frequency of baseline biomarker alterations between patients without versus those with clinical benefit. Related to Table 4. \*The frequency of each biomarker was compared between patients with and without benefit by analyzing  $2 \times 2$  contingency tables using a two-sided Fisher's exact test (significance level: 0.05). <sup>†</sup>As *EGFRamp* status was included within the definition of focal *MET* amplification, it was not analyzed further as a single biomarker. Alterations occurring in  $\geq 3$  patients in one or both groups were analyzed. amp, amplification; CI, confidence interval; mt, mutation.



## Supplementary Tables

| TEAE                                        | Patients, n (%) (n=24) |
|---------------------------------------------|------------------------|
| TEAEs leading to treatment discontinuation* |                        |
| Disease progression                         | 2 (8.3)                |
| Respiratory failure                         | 2 (8.3)                |
| Pneumonia                                   | 1 (4.2)                |
| Sepsis                                      | 1 (4.2)                |
| Septic shock                                | 1 (4.2)                |
| Serious TEAEs <sup>†</sup>                  |                        |
| Disease progression                         | 3 (12.5)               |
| Generalized edema                           | 2 (8.3)                |
| Pneumonia                                   | 2 (8.3)                |
| Pneumothorax                                | 2 (8.3)                |
| Respiratory failure                         | 2 (8.3)                |

**Supplementary Table 1.** TEAEs leading to treatment discontinuation and serious TEAEs, irrespective of causality. Related to Table 3

\*All TEAEs leading to treatment discontinuation were considered unrelated to treatment. <sup>†</sup>Serious TEAEs reported in  $\geq 5\%$  of patients are shown; two patients had serious TEAEs that were considered treatment-related (one patient had generalized edema, and one patient had peripheral edema and dyspnea).  
Abbreviation: TEAE, treatment-emergent adverse event.

| Visit    | Patients on treatment, n | Questionnaire completion rate, n (%) |               |                |
|----------|--------------------------|--------------------------------------|---------------|----------------|
|          |                          | EQ-5D-5L                             | EORTC QLQ-C30 | EORTC QLQ-LC13 |
| Baseline | 24                       | 22 (91.7)                            | 22 (91.7)     | 22 (91.7)      |
| Week 6   | 17                       | 16 (94.1)                            | 16 (94.1)     | 16 (94.1)      |
| Week 12  | 12                       | 11 (91.7)                            | 11 (91.7)     | 11 (91.7)      |
| Week 18  | 10                       | 9 (90.0)                             | 9 (90.0)      | 9 (90.0)       |
| Week 24  | 8                        | 6 (75.0)                             | 6 (75.0)      | 6 (75.0)       |
| Week 30  | 7                        | 6 (85.7)                             | 6 (85.7)      | 6 (85.7)       |
| Week 36  | 5                        | 5 (100.0)                            | 5 (100.0)     | 5 (100.0)      |
| Week 48  | 5                        | 5 (100.0)                            | 5 (100.0)     | 5 (100.0)      |
| Week 60  | 5                        | 4 (80.0)                             | 4 (80.0)      | 4 (80.0)       |

**Supplementary Table 2.** HRQoL questionnaire completion rates by visit. Related to Table 2

Abbreviations: EORTC QLQ-C30, European Organisation for Research and Treatment of Cancer Quality of Life Questionnaire Core 30; EORTC QLQ-LC13, European Organisation for Research and Treatment of Cancer Quality of Life Questionnaire Lung Cancer 13; EQ-5D-5L, EuroQol 5-dimension 5-level; HRQoL, health-related quality of li

| HRQoL score                 | Mean score at baseline (SD) (n=22) | Mean change from baseline <sup>‡</sup> |                                       |                                          |
|-----------------------------|------------------------------------|----------------------------------------|---------------------------------------|------------------------------------------|
|                             |                                    | Overall (n=24)                         | Patients with clinical benefit (n=11) | Patients without clinical benefit (n=13) |
| EQ-5D-5L VAS*               | 58 (17.2)                          | 0.79                                   | 9.10                                  | -8.54                                    |
| EORTC QLQ-C30 GHS*          | 56.1 (20.0)                        | -0.64                                  | 4.71                                  | -6.59                                    |
| EORTC QLQ-LC13 <sup>†</sup> |                                    |                                        |                                       |                                          |
| Cough                       | 34.8 (34.9)                        | -1.25                                  | -3.09                                 | 1.22                                     |
| Dyspnea                     | 30.8 (29.3)                        | 0.22                                   | -1.90                                 | 2.87                                     |
| Chest pain                  | 25.8 (30.7)                        | -6.20                                  | -17.14                                | 5.61                                     |

**Supplementary Table 3.** Baseline and mean change from baseline in HRQoL scores calculated by linear mixed model regression, overall, and according to clinical benefit. Related to Table 2

\*Higher scores indicate greater function. <sup>†</sup>Lower scores indicate milder symptoms. <sup>‡</sup>Analysis based on an earlier data cut-off (February 1, 2021); however, as the dataset from the later cut-off (August 20, 2021) contained only seven additional responses per questionnaire from a total of four patients, results are expected to remain consistent between the two analyses.

Abbreviations: EORTC QLQ-C30, European Organisation for Research and Treatment of Cancer Quality of Life Questionnaire Core 30; EORTC QLQ-LC13, European Organisation for Research and Treatment of Cancer Quality of Life Questionnaire Lung Cancer 13; EQ-5D-5L, EuroQol 5-dimension 5-level; GHS, global health score; HRQoL, health-related quality of life; SD, standard deviation; VAS, visual analog scale.

| Point mutations (single-nucleotide variants)<br>(73 genes) |               |                                 |                               |                               |                              | Indels<br>(23 genes) |               | Amplifications (18<br>genes) |               | Fusions<br>(6 genes) |
|------------------------------------------------------------|---------------|---------------------------------|-------------------------------|-------------------------------|------------------------------|----------------------|---------------|------------------------------|---------------|----------------------|
| <i>AKT1</i>                                                | <i>ALK</i>    | <i>APC</i>                      | <i>AR</i>                     | <i>ARAF</i>                   | <i>ARID1A</i>                | <i>ATM</i>           | <i>APC</i>    | <i>AR</i>                    | <i>BRAF</i>   | <i>ALK</i>           |
| <i>ATM</i>                                                 | <i>BRAF</i>   | <i>BRCA1</i>                    | <i>BRCA1</i>                  | <i>CCND1</i>                  | <i>CCND2</i>                 | <i>ARID1A</i>        | <i>BRCA1</i>  | <i>CCND1</i>                 | <i>CCND2</i>  | <i>FGFR2</i>         |
| <i>CCNE1</i>                                               | <i>CDH1</i>   | <i>CDK4</i>                     | <i>CDK6</i>                   | <i>CDKN2A</i>                 | <i>CTNNB1</i>                | <i>BRCA2</i>         | <i>CDH1</i>   | <i>CCNE1</i>                 | <i>CDK4</i>   | <i>FGFR3</i>         |
| <i>DDR2</i>                                                | <i>EGFR</i>   | <i>ERBB2</i><br>( <i>HER2</i> ) | <i>ESR1</i>                   | <i>EZH2</i>                   | <i>FBXW7</i>                 | <i>CDKN2A</i>        | <i>EGFR</i>   | <i>CDK6</i>                  | <i>EGFR</i>   | <i>NTRK1</i>         |
| <i>FGFR1</i>                                               | <i>FGFR2</i>  | <i>FGFR3</i>                    | <i>GATA3</i>                  | <i>GNA11</i>                  | <i>GNAQ</i>                  | <i>ERBB2</i>         | <i>GATA3</i>  | <i>ERBB2</i>                 | <i>FGFR1</i>  | <i>RET</i>           |
| <i>GNAS</i>                                                | <i>HNF1A</i>  | <i>HRAS</i>                     | <i>IDH1</i>                   | <i>IDH2</i>                   | <i>JAK2</i>                  | <i>KIT</i>           | <i>MET</i>    | <i>FGFR2</i>                 | <i>KIT</i>    | <i>ROS1</i>          |
| <i>JAK3</i>                                                | <i>KIT</i>    | <i>KRAS</i>                     | <i>MAP2K1</i><br><i>/MEK1</i> | <i>MAP2K2</i><br><i>/MEK2</i> | <i>MAPK1</i><br><i>/ERK2</i> | <i>MLH1</i>          | <i>MTOR</i>   | <i>KRAS</i>                  | <i>MET</i>    |                      |
| <i>MAPK3</i><br><i>/ERK1</i>                               | <i>MET</i>    | <i>MLH1</i>                     | <i>MPL</i>                    | <i>MTOR</i>                   | <i>MYC</i>                   | <i>NF1</i>           | <i>PDGFRA</i> | <i>MYC</i>                   | <i>PDGFRA</i> |                      |
| <i>NF1</i>                                                 | <i>NFE2L2</i> | <i>NOTCH1</i>                   | <i>NPM1</i>                   | <i>NRAS</i>                   | <i>NTRK1</i>                 | <i>PTEN</i>          | <i>RB1</i>    | <i>PIK3CA</i>                | <i>RAF1</i>   |                      |
| <i>NTRK3</i>                                               | <i>PDGFRA</i> | <i>PIK3CA</i>                   | <i>PTEN</i>                   | <i>PTPN11</i>                 | <i>RAF1</i>                  | <i>SMAD4</i>         | <i>STK11</i>  |                              |               |                      |
| <i>RB1</i>                                                 | <i>RET</i>    | <i>RHEB</i>                     | <i>RHOA</i>                   | <i>RIT1</i>                   | <i>ROS1</i>                  | <i>TP53</i>          | <i>TSC1</i>   |                              |               |                      |
| <i>SMAD4</i>                                               | <i>SMO</i>    | <i>STK11</i>                    | <i>TERT*</i>                  | <i>TP53</i>                   | <i>TSC1</i>                  | <i>VHL</i>           |               |                              |               |                      |
| <i>VHL</i>                                                 |               |                                 |                               |                               |                              |                      |               |                              |               |                      |

**Supplementary Table 4.** A summary of the 73 genes analyzed by the Guardant360® liquid biopsy (ctDNA) for each patient. Related to STAR Methods

\*Includes *TERT* promoter region.

Table adapted from: [Guardant360® - Therapy Planning with Blood \(Liquid Biopsy\)](#)

Exons chosen to enhance detection of know somatic mutations.
